1 **Identification of differentially expressed small RNAs and prediction of**  
2 **target genes in Italian Large White pigs with divergent backfat**  
3 **deposition**

4

5 Running head: MiRNA-gene interaction in pig backfat

6

7 Roberta Davoli<sup>1\*</sup>, Enrico Gaffo<sup>2\*</sup>, Martina Zappaterra<sup>1</sup>, Stefania Bortoluzzi<sup>2§</sup>, Paolo Zambonelli<sup>1§</sup>

8

9 <sup>1</sup> Department of Agricultural and-Food Sciences (DISTAL), University of Bologna, Viale G. Fanin

10 46, 40127 Bologna, Italy.

11 <sup>2</sup> Department of Molecular Medicine, University of Padova, Viale G. Colombo 3, 35131 Padova,

12 Italy

13 \* Equally contributing first Author

14 § Equally contributing last Author

15

16 <sup>§</sup>To whom correspondence should be addressed: [paolo.zambonelli@unibo.it](mailto:paolo.zambonelli@unibo.it)

17

## 18 **Summary**

19 The identification of the molecular mechanisms regulating pathways associated to the potential  
20 of fat deposition in pigs can lead to the detection of key genes and markers for the genetic  
21 improvement of fat traits. MicroRNAs (miRNAs) interactions with target RNAs regulate gene  
22 expression and modulate pathway activation in cells and tissues. In pigs, miRNA discovery is  
23 well far from saturation and the knowledge of miRNA expression in backfat tissue and  
24 particularly of the impact of miRNA variations are still fragmentary. We characterized by RNA-  
25 seq the small RNAs (sRNAs) expression profiles in Italian Large White pig backfat tissue.  
26 Comparing two groups of pigs divergent for backfat deposition, we detected 31 significant  
27 differentially expressed (DE) sRNAs, 14 up-regulated (including ssc-miR-132 ,ssc-miR-146b, ssc-  
28 miR-221-5p, ssc-miR-365-5p, and the moRNA ssc-moR-21-5p) and 17 down-regulated (including  
29 ssc-miR-136, ssc-miR-195, ssc-miR-199a-5p, and ssc-miR-335). To understand the biological  
30 impact of the observed miRNA expression variations, we used the expression correlation of DE  
31 miRNA target transcripts expressed in the same samples to define a regulatory network of 193  
32 interactions between DE miRNAs and 40 DE target transcripts showing opposite expression  
33 profiles and being involved in specific pathways. Several miRNAs and mRNAs in the network  
34 resulted to be expressed from backfat related pig QTLs. These results are informative on the  
35 complex mechanisms influencing fat traits, shed light on a new aspect of the genetic regulation  
36 of fat deposition in pigs, and facilitate the perspective implementation of innovative strategies  
37 of pig genetic improvement based on genomic markers.

38

39 **Keywords:** swine, backfat, microRNA, moRNA, differential expression, regulatory network,  
40 genetic improvement

41

42

## 43 **Introduction**

44 Backfat deposition in pigs is an important selection trait closely connected with carcass and  
45 meat quality. MicroRNAs (miRNAs) and miRNA-like short RNAs (sRNAs) represent a functionally  
46 relevant RNA category modulating the expression of coding messenger RNAs (mRNAs) and  
47 noncoding transcripts in almost all tissues. In pigs, only 411 mature miRNAs are included in the  
48 current miRBase release 21 (Kozomara and Griffiths-Jones, 2013), being less than 16% of the  
49 number of human miRNAs, indicating that miRNA discovery in pigs is far from reaching  
50 saturation. To date, only few papers describing miRNAs expression in porcine adipose tissues  
51 have been published (Li et al., 2011; Chen et al, 2012; Li et al., 2012; Bai et al., 2014). Recently,  
52 the transcription profiles of sRNAs in backfat of two Italian Large White pigs have been  
53 described in Gaffo et al. (2014), reporting new miRNAs, isomiRs and moRNAs, and showing the  
54 complexity of sRNA population in the porcine backfat tissue. RNA-seq was recently used to  
55 study transcriptome variations in backfat tissue comparing two groups of Italian Large White  
56 pigs divergent for backfat deposition, getting a deeper knowledge of the molecular processes  
57 regulating the potential of fat deposition in pigs (Zambonelli et al., 2016), that is essential to  
58 identify key genes and markers for the genetic improvement of fat traits.

59 In this study, we used RNA-seq to describe the transcription profile of sRNAs expressed in  
60 porcine backfat tissue and to identify sRNAs differentially expressed between fat and lean pigs.  
61 Furthermore, linking miRNAs and target transcripts whose expression vary in relation to backfat  
62 deposition we reconstructed a regulatory network that disclose the impact of miRNAs  
63 regulatory action on fat traits.

64

## 65 **Materials and Methods**

### 66 **Samples collection and sequencing**

67 For this analysis we used 18 of the Italian Large White pigs and the backfat samples collected  
68 and described in Zambonelli et al. (2016). All animals used in this study were kept according to  
69 Italian and European laws for pig production and all the adopted procedures were fully  
70 compliant with national and European Union regulations for animal care and slaughtering. We  
71 considered short RNA-seq data of backfat tissue in 18 animals, comprising 9 pigs with high  
72 backfat thickness (FAT) and 9 pigs with low backfat thickness (LEAN), as described before in  
73 Zambonelli et al. (2016). The 18 RNA samples were newly sequenced (series record GSE108829)  
74 as detailed below.

75 Backfat samples stored at -80 °C in a deep freezer were used for total RNA extraction using  
76 Trizol (Invitrogen) according to the manufacturer's instructions. Extracted RNA was quantified  
77 using the Nanodrop ND-1000 spectrophotometer, and the quality of the extracted RNA was  
78 assayed using an Agilent 2100 BioAnalyzer (Supplementary Table 1). Eighteen small RNA  
79 libraries were prepared from total RNA using the TruSeq Small RNA kit (Illumina) and version 3

80 of the reagents following the manufacturer's suggested protocol. The libraries were individually  
81 tagged and run on 9 lanes of an Illumina GAI.

82

### 83 Computational analysis of small RNA sequencing data

84 The bioinformatics pipeline used is summarized in Supplementary Figure 1, informing also on  
85 the study design. RNA-seq data were processed with a combination of the miR&moRe pipeline  
86 (Bortoluzzi et al., 2012; Gaffo et al., 2014) and of miRDeep2 (Friedländer et al., 2011), which  
87 was exploited to discover new precursor hairpins that express mature miRNAs (NPmiRNAs) in  
88 the samples: we run miR&moRe on the known porcine miRNAs plus a high confidence set of  
89 predictions, obtained by miRDeep2.

90 MiRDeep2 v0.0.5 was run with default parameters pooling the sample read sets. Input genome  
91 and miRNA annotation were the same used for miR&moRe (UCSC database susScr3 genome  
92 and miRBase release 21). We filtered miRDeep2 predictions restricting to precursors with  
93 miRDeep2 score greater than 1.0, length greater than or equal to 50 nt and predicted  
94 probability of being a miRNA greater than 60% (Londin et al., 2015). The novel precursor  
95 annotation predicted by miRDeep2 was added to miRBase swine miRNA annotation and given  
96 as input to miR&moRe, which was run on the 18 newly sequenced samples.

97 MiR&moRe quantifies small RNAs from RNA-seq experiments, detect as well miRNA isoforms  
98 (isomiRs), novel miRNAs expressed in known hairpin precursors with only one miRNA  
99 annotated, and identify also miRNA-offset RNAs (moRNAs; Bortoluzzi et al., 2011; Bortoluzzi et  
100 al., 2012; Guglielmelli et al., 2015). The miR&moRe pipeline performs a preliminary cleaning  
101 and quality preprocessing of the input raw sequences. Reads passing the quality filter are

102 aligned to the reference miRNA precursors and to the reference genome for expression  
103 quantification. Identification and expression quantification of isomiRs and moRNAs follow from  
104 the alignments and sequence folding predictions. Small RNAs expression levels are measured as  
105 read alignment counts in each sample.

106

## 107 Differential expression assessment and validation

108 Read counts were normalized across all the samples according to the DESeq2 (v1.4.5; Love et  
109 al., 2014) approach. Small RNAs represented by less than ten normalized reads considering all  
110 samples were excluded from further analysis. Short RNA differential expression comparing FAT  
111 and LEAN groups was assessed by DESeq2, considering significant those variations with FDR <  
112 0.05 (Benjamini-Hochberg adjusted P-values).

113 Validations of miRNAs differentially expressed according to RNA-seq analysis have been  
114 obtained by Quantitative Real Time PCR (qRT-PCR) analysis on the same samples, performed in  
115 triplicate. The TaqMan® Micro RNA Assay kit (Applied Biosystems) was used, following the  
116 customer protocol, as reported in Gaffo et al. (2014), and using as internal reference the U6  
117 snRNA (Chen et al., 2012; Yu et al., 2012). For the relative miRNA quantification, the PCR-  
118 derived cycle threshold (Cq) of target miRNAs is compared with that of a stably expressed  
119 endogenous miRNA from the same sample. The difference between these values is the  $\Delta Cq$   
120 value (Rai et al., 2012). A t-test was used to assess the significance of the differential expression  
121 estimated by qRT-PCR, considering a significance threshold of P-value <0.05.

122

123 Small RNA target prediction on backfat long RNA data

124 The transcription profiles of long RNAs in the same pig backfat samples (GSE68007) already  
125 analyzed in Zambonelli et al. (2016) were used for integrative analyses with miRNA expression  
126 profiles, considering matched miRNA and transcript expression data in backfat of FAT and LEAN  
127 animals. MiRanda v3.3a (Enright et al., 2003) was applied to predict target sites on the 63,418  
128 transcript sequences reported by Zambonelli et al. (2016). For each differentially expressed  
129 miRNA (DEM), the prediction was computed using the most abundant isomiR sequences  
130 (detected as reported in Gaffo et al., 2014), keeping only isomiRs contributing each at least 10%  
131 of the miRNA expression.

132 Next, focusing on differentially expressed small RNAs, we calculated Spearman pairwise  
133 correlations between sRNA and DEM expression profiles, and tested the significance of the  
134 correlations. According to largely prevalent repressive role of miRNAs on target transcripts, we  
135 focused on the negative correlations, whose association P-values were corrected for multiple  
136 tests (Benjamini-Hochberg). Only negative correlations with FDR at most 10% were considered  
137 significant to identify miRNA-transcript relations that are supported by expression data analysis.  
138 Significant miRNA-transcript relations with correlation  $< -0.6$  were selected to draw an  
139 interaction network, using Cytoscape version 3.3. Pathways enriched in genes included in the  
140 network have been calculated with EnrichR (<http://amp.pharm.mssm.edu/Enrichr/>; Kuleshov et  
141 al., 2016), selecting KEGG and Reactome databases and considering significant those pathways  
142 with adjusted P-value at most 0.1 and including at least two genes.

143

144 Quantitative Trait Loci enrichment on target genomic regions

145 For each pig QTL annotated in the PigQTL database ([http://www.animalgenome.org/cgi-](http://www.animalgenome.org/cgi-bin/QTLdb/SS/download?file=gbpSS_10.2)  
146 [bin/QTLdb/SS/download?file=gbpSS\\_10.2](http://www.animalgenome.org/cgi-bin/QTLdb/SS/download?file=gbpSS_10.2)), we counted the number of differentially expressed  
147 sRNAs and their predicted target genes considering only those with differentially expressed  
148 transcripts with FDR at most 30% according to Zambonelli et al. (2016) mapping in the genomic  
149 region. QTL enrichment in miRNA and genes was tested using the upper-tailed hypergeometric  
150 test for over-representation, with one side mid p-values as defined in Rivals et al. (2007). The  
151 analysis used as background the pig genome annotation (v 10.2.80) merged with the new genes  
152 discovered in Zambonelli et al. (2016), resulting in 34,617 genes, and the new sRNAs detected  
153 in this study. We considered as significantly enriched only those QTLs showing adjusted P-  
154 values <0.1.

155

## 156 **Results**

### 157 Small RNA identification and quantification from RNA-seq data

158 RNA-seq analysis produced in 97 million reads per sample on average, that after read trimming  
159 and subsequent filtering steps (Supplementary Table 2) were reduced to 37 million high quality  
160 reads per sample, in average, that were further processed for the sRNAs characterization. We  
161 applied stringent filtering criteria in the processing of the raw data to obtain high quality read  
162 sets deprived of sequencing artifacts, at the cost of high number of discarded sequences. This  
163 approach and the number of biological replicates contributed to the reliability of downstream  
164 predictions, in particular regarding novel elements like moRNAs and isomiRs.



165 MiRDeep2 analysis of RNA-seq data predicted 1,340 new miRNA precursors characteristic of pig  
166 genome, expressing 2,680 putative novel mature miRNAs, whose sequences do not overlap  
167 each other and with different sequence from pig miRNA precursors reported in miRBase. Of  
168 these, 103 NPMiRNAs passed the filtering criteria and were considered for following analyses.  
169 Overall, 426 sRNAs resulted expressed in the new dataset, including 231 known miRNAs, 69  
170 new miRNAs from known precursors, 103 new miRNAs from new precursors, and 23 moRNAs  
171 (Supplementary Table 3).

172 As observed in Gaffo et al. (2014), the expression distribution was very skewed: only 24 known  
173 miRNAs (5.6% of the expressed sRNAs) accounted for the 90% of the total expression, and only  
174 21.1% of expressed sRNAs accounted the 99% of the total expression (Supplementary Figure 2).  
175 Ssc-miR-10b, ssc-miR-143-3p and ssc-148a-3p resulted very abundant and accounted together  
176 for about the 52% of the total expression, with the first two accounting for respectively about  
177 33% and 13% of the expression.

178

## 179 Differentially expressed sRNAs

180 Among the 426 sRNAs expressed in the considered porcine backfat samples, 31 resulted  
181 differentially expressed comparing LEAN and FAT animals (Table 1, Supplementary Table 4): 18  
182 known miRNAs, 6 new sister miRNAs, 6 miRNAs from new precursors and ssc-moR-21-5p,  
183 whose existence was previously validated by qRT-PCR (Gaffo et al., 2014). Figure 1 shows the  
184 unsupervised clustering and heatmap of expression profiles of the 31 DEM in the 18 samples  
185 and two animal groups considered. SRNAs up- and down-regulated in FAT animals were 14 and

186 17, respectively. Up-regulated sRNAs include six known miRNAs (ssc-miR-146b, ssc-miR-365-5p,  
187 ssc-miR-221-5p, ssc-miR-222, ssc-miR-132 and ssc-miR-1306-5p) the moRNA ssc-moR-21-5p, a  
188 new pig sister miRNA (ssc-miR-128-1-5p) and six mature miRNAs from newly predicted  
189 precursors. All down-regulated sRNAs are miRNAs from already annotated precursors, including  
190 12 known miRNAs (ssc-let-7c, ssc-miR-130a, ssc-miR-181c, ssc-miR-199a-5p, ssc-miR-199a-3p,  
191 ssc-miR-199b-3p, ssc-miR-195, ssc-miR-193a-3p, ssc-miR-335, ssc-miR-133a-3p, ssc-miR-545-3p,  
192 ssc-miR-136) and 5 new sister miRNAs (ssc-miR-214-5p, ssc-miR-99a-3p, ssc-miR-101-2-5p, ssc-  
193 miR-136-3p, ssc-miR-362-3p, ssc-miR-128-1-5p).  
194 We selected 9 DEMs, 8 miRNAs and ssc-moR-21-5p, for the qRT-PCR validation of differential  
195 expression. A good agreement between RNA-seq and qRT-PCR expression estimates was  
196 observed ( $R^2=0.78$ , Figure 2A) supporting the robustness of the data reported for all the small  
197 RNAs detected in this study. Indeed, all the comparisons performed show the same trend  
198 between the two analyses, and 5 out of 9 DE sRNAs resulted significantly differentially  
199 expressed also according to RT-PCR estimations (Figure 2B).

200

## 201 IsomiR composition of differentially expressed sRNAs

202 IsomiRs were investigated for the DEM showing more than one variant (18 known and 6 novel-  
203 precursor miRNAs out of the 31 DEM). Fifty-nine distinct isomiRs were detected, specifically 58  
204 in LEAN and 55 in FAT of which 54 were in common. Four isomiRs are specific for LEAN samples  
205 and one is specific for FAT samples (Supplementary Table 5).

206 The number of isomiRs contributing at least 10% of each DEM expression ranged from one to  
207 four, a maximum value detected in three cases (chr5\_31322-3p, JH118494-1\_44794-3p,

208 chr9\_40038-5p). Three miRNAs (chr7\_37486-3p, ssc-miR-136 and ssc-miR-193a-3p) are  
209 represented by only one major isoform accounting for more than half of the miRNA expression  
210 (Supplementary Figure 3A). Most isoforms, according to miR&moRe classification, are  
211 variations of the length: isomiRs in the “shorter\_or\_longer” category are 32 out of 58 in LEAN  
212 and 29 out of 55 in FAT; the variants perfectly matching the reference sequence (“exact”  
213 variants, or “canonical” isomiRs) are 18 in both groups; and “one-mismatch” variation isomiRs  
214 are eight. Less than half of DEMs (10 cases in LEAN and 11 in FAT) express the canonical isomiR  
215 as the major form. Conversely, “shorter or longer” isoforms compose the largest part of the  
216 expression in 12 LEAN and 11 FAT cases. Notably, in 6 DEMs the exact isomiR contributed less  
217 than 10% to the miRNA expression (Supplementary Figure 3B). These findings are consistent  
218 with our previous results (Gaffo et al., 2014) showing a similar distribution of isomiRs and  
219 indicating that in pig backfat the canonical miRNA isoform is not always the most expressed for  
220 the miRNA.

221

222 Network of short and long differentially expressed RNA interactions in pig backfat

223 The target prediction considered 66 sRNA sequences, including 59 abundant isomiRs from the  
224 18 known miRNAs and the 6 NPmiRNAs, plus 6 new sister-miRNAs and ssc-moR-21-5p. The  
225 predicted relations with significant strong negative correlations accounted for 56,683 sRNA-  
226 transcript interactions, involving 22,362 transcripts from 12,373 unique genes. All the 66  
227 isomiRs potentially targeted at least one transcript each. Among the known miRNAs, ssc-miR-  
228 365-5p presented the largest number of targets (3,095 different transcripts targeted,  
229 corresponding to 2,624 genes), while in absolute chr3\_26283-5p has the largest number of

230 target transcripts (3,383; 2,878 genes). Ssc-miR-136-3p has the smallest number of targets (524;  
231 465 genes), while among the new miRNAs chr7\_37486-3p has the minimum (1,011; 862 genes).  
232 Considering the very large number of predicted interactions we focused particularly on the  
233 predicted sRNA targets included among the 86 DETs reported in Zambonelli et al. (2016),  
234 resulting in 193 putative regulatory interactions between 30 DEMs and 40 target DETs  
235 (Supplementary Table 6) that may contribute to regulate the metabolic activity of porcine  
236 backfat. The network in Figure 3A-B show the interactions supported by strong correlation.  
237 KEGG and Reactome pathways significantly enriched in target DETs in the network are shown in  
238 Figure 3C. The down regulated genes *HSPA1A*, *HSPA1B*, and *DNAJB1* are linked to cellular stress  
239 responses, to the regulation of stress-induced transcription by *HSF1*, and its modulation by  
240 attenuation that occurs during continuous exposure to intermediate heat shock conditions or  
241 upon recovery from stress. The same three genes and *MRC1* and *ATP6V0D2* participate in  
242 several pathways linked to immunity. Furthermore, five genes (*ADSSL1*, *AKAP5*, *BCAT1*, *HMOX1*,  
243 and *PLIN2*) are linked to metabolic pathways.  
244 The involvement of several genes in the network in specific pathways is informative on the  
245 putative regulatory activity of selected miRNAs beyond single targets, suggesting their impact  
246 on pathway regulation by coordinated activity on several functionally connected genes. Four of  
247 the metabolism-linked genes are overexpressed in FAT animals and resulted under putative  
248 control of common underexpressed miRNAs, with both *BCAT1* and *AKAP5* possibly repressed by  
249 the ssc-let-7c, and *HMOX1* and *BCAT1* by ssc-miR-195. The underexpressed stress responses  
250 genes are under putative control of specific miRNAs, as *HSPA1A*, *HSPA1B*, and *DNAJB1* can be

251 coordinately repressed by the upregulated and validated ssc-miR-146, and the triplet *HSPA1B*,  
252 *DNAJB1* and *HSP70* by ssc-miR-365.

253

254 QTL enrichment of differentially expressed sRNAs and mRNAs loci

255 As miRNAs and genes with transcripts differentially expressed in LEAN and FAT animals and  
256 their interactions could be implicated in genetic modulation of backfat deposition, we looked  
257 for the overlap between their loci and pig QTL, and we observed 56 significantly enriched QTL  
258 (Supplementary Table 7). Notably, a significant enrichment in miRNAs and their target DE genes  
259 was observed for four backfat-specific carcass quality QTLs (Supplementary Table 7). Two  
260 largely overlapping QTLs (QTL 21222 “Average backfat thickness” chr4:74,725,606-82,527,275;  
261 QTL 21228 “Backfat at first rib” chr4: 76,741,953-83,693,913) covering approximately 9 Mb  
262 contains four DE transcripts from *PENK* gene and from a predicted gene. Two enriched  
263 “Average backfat thickness” QTLs were identified in chromosome 8 (QTL 29568, chr8:  
264 33,033,004-33,985,796, XLOC\_032101 / *UCHL1*) and 12 (QTL 5990, chr12: 23,672,762-  
265 60,040,247). The most interesting enriched QTL is located in chromosome 12 and contains the  
266 genes expressing eight DETs, and notably five DE miRNAs (the up-regulated ssc-miR-193a-3p  
267 and ssc-miR-195 and the down-regulated ssc-miR-132, ssc-miR-365 and ssc-moR-21-5p)  
268 strengthening the indication of a possible role of these sRNAs in the backfat phenotype  
269 variation.

270

271 **Discussion**

272 We reported the landscape of sRNA expression in swine backfat, detecting and quantifying 426  
273 sRNAs expressed, including 403 miRNAs and 23 moRNAs, confirming previous data (Gaffo et al.,  
274 2014) and extending them, by increasing the number of sRNAs detected in pig backfat.  
275 The FAT and LEAN animals expression profile comparison disclosed 31 differentially expressed  
276 sRNAs whose abundance is related to backfat level, including 30 miRNAs and a moRNA, ssc-  
277 moR-21-5p, that resulted downregulated in FAT animals. These results are backed up by  
278 quantitative real-time PCR validations conducted on a sizeable subset of the DE sRNAs detected  
279 by RNA-seq (Figure 2), including known miRNAs, new mature miRNAs of known precursors, and  
280 a moRNA, with different expression levels and variable variations strengths in the comparison  
281 between FAT and LEAN animals.

282 Thirty DE miRNAs possibly targeted 40 out of 86 backfat DETs, while no putative targets were  
283 detected among the same backfat DETs for ssc-moR-21-5p. This study confirmed a possible link  
284 between ssc-moR-21 and adipocyte physiology (Gaffo et al., 2014) that deserves further  
285 investigation.

286 Altogether, almost two thousands putative miRNA-target interactions emerged considering the  
287 correlation between the DE miRNAs and the DE mRNAs and represented as a functional  
288 network (Figure 3).

289 The majority of the transcripts included in the network are coding (green squares) while there  
290 are four putative noncoding (grey and orange squares). *BCAT1* (branched chain amino acid  
291 transaminase 1) and *GPNMB* (glycoprotein Nmb) are represented by both coding and one  
292 noncoding isoforms.

293 The less expressed ssc-miR-199a-5p potentially regulate several transcripts, including coding  
294 transcripts of different genes, different isoforms derived from the same gene, and unannotated  
295 transcripts found overexpressed in FAT vs LEAN pigs. As already described in Zambonelli et al.  
296 (2016) some of them are involved in lipid metabolism (perilipin 2, *PLIN2*) or in the regulation of  
297 food intake (*GPNMB*). Ssc-miR-199a-5p was found under-expressed in the FAT pigs, in  
298 agreement with previous data on the underexpression of this miRNA in attenuating cell  
299 proliferation and promoting lipid deposition in porcine pre-adipocytes (Shi X-E et al., 2014).  
300 Ssc-miR136, ssc-miR-99a-3p, and ssc-miR-214-5p were down-regulated in FAT vs LEAN pigs. In  
301 lambs, miR-136 was differentially expressed in subcutaneous adipose tissue compared with  
302 perirenal fat (Meale et al., 2014). Guo et al. (2012) linked miR-99a to preadipocyte  
303 differentiation both in porcine intramuscular and subcutaneous vascular stem cells. The same  
304 miRNA was twofold more expressed in adult subcutaneous adipose tissue than in juvenile  
305 adipose tissue in pigs by Li et al. (2011). miR-214 was previously related to adipose-derived  
306 stem cells differentiation in rats) and resulted up-regulated in rat stem cells isolated from  
307 subcutaneous fat compared with omentum (Hu et al., 2017).  
308 The importance of ssc-miR-335 in the regulation of biological and molecular processes  
309 responsible of different fat deposition between FAT and LEAN animals is supported by previous  
310 data linking this miRNA to the control of fat traits (Nakanishi et al., 2009; Oger et al., 2014; and  
311 Zhu et al., 2014). In our network, the down-regulation of miR-335 is linked to *BCAT1*  
312 overexpression. Under-expressed putative targets of overexpressed miRNAs include one  
313 protein coding gene transcripts (*DNAJB1*) and noncoding transcripts, mostly belonging to heat  
314 shock protein genes (*HSP70*, *HSPA1A*, *HSPA1B*) that deserve further investigation.

315 Ssc-miR-146b could control the expression of three genes down-regulated all coding for heat  
316 shock proteins (*DNAJB1*, *HSPA1A*, *HSPA1B*), whereas ssc-miR-365-5p was linked to *DNAJB1*,  
317 *HSPA1A* and *HSP70*, indicating that the two overexpressed *miRNAs* could contribute to  
318 regulation pattern of common targets possibly with a synergistic effect. The action of miR-146b  
319 on tissue inflammation was described in human obesity by different Authors (Hulsmans et al.,  
320 2012; Shi C et al., 2014) who reported that, despite the obese condition, an attenuation of  
321 cytokine signaling reduced the effect of the inflammation on the tissues. In visceral and  
322 subcutaneous adipose tissue of over weighted and obese human subjects, miR-146b  
323 overexpression promoted preadipocyte differentiation, not impacting proliferation (Ahn et al.,  
324 2013; Chen et al., 2014). These evidences suggest a likely explanation of the lower level of  
325 expression on backfat tissue in FAT pigs of heat shock protein DETs as response to a chronic  
326 inflammation (Zambonelli et al., 2016) providing as well a link with miRNA expression and  
327 regulatory activity.

328 Of miRNAs overexpressed in FAT animals, ssc-miR-132 was upregulated in the hypothalamus of  
329 rats fed with a high fat diet (Sangiao-Alvarellos et al., 2014), and in omental fat and plasma of  
330 obese humans (Heneghan et al., 2011), whereas the overexpression of miR-221 was associated  
331 to an increase in adipocytokines expression in mice (Parra et al., 2010) and with body mass  
332 index increase in subcutaneous and abdominal adipose tissue in human Pima Indians (Meerson  
333 et al., 2013) where, intriguingly, the increase of body mass index was associated also with the  
334 under-expression of miR-199a-3p, fully in accordance with our observations.

335 Several elements of the network, are expressed by genomic regions harboring QTL associated  
336 with backfat thickness, supporting the presence and contributing to the identification of



337 positional and functional candidate genes for fat traits. The SSC12 QTL region arbors both the  
338 overexpressed ssc-mir-132 and the under-expressed ssc-mir-195. Within a QTL it is possible to  
339 found an epistatic effect of different genetic elements acting on opposite direction in the  
340 phenotype determination (Cordell, 2002). However, the action on the phenotype of these two  
341 miRNAs could be concordant or even synergistic if they repress the expression of genes whose  
342 products have opposite roles in biological processes or signaling pathways.

343 Collectively, our data and the above discussed literature informed on the involvement of  
344 miRNAs in the regulation of genes active in adipose tissue, suggesting that the identified DE  
345 miRNAs can modulate several functions related to the adipose tissue development and growth,  
346 in particular adipocyte differentiation, adipogenesis, lipid deposition, and obesity in humans.  
347 Specific miRNAs might modulate as well heat shock transcript expression, supporting the idea  
348 that pigs with an increased potential for fat deposition present some aspects similar to those  
349 described in human obesity in which a mild inflammation blocks an excessive harmful effect on  
350 a high level of inflammation when a chronic increase of fat tissue as in obesity occurs.

351 We found new genes, mRNAs and miRNAs that, according to sequence and expression data,  
352 could be involved in the complex network of regulation of backfat deposition. Our results  
353 explain part of the complex mechanisms influencing fat traits, shedding light on new aspect of  
354 the genetic regulation of fat deposition in pigs, and facilitate the perspective implementation of  
355 innovative strategies of pig genetic improvement based on genomic markers.

356

## 357 **Acknowledgements**

358 This work was supported by Progetto “AGER - Agroalimentare e ricerca”: Advanced research in  
359 genomics and processing technologies for the Italian heavy pig production – Hepiget (Grant N.  
360 2011-0279).

361 The authors declare that they have no competing interests.

362

## 363 **References**

364 Ahn, J., Lee, H., Jung, C.H., Jeon, T.I., Ha, T.Y., 2013. MicroRNA-146b Promotes Adipogenesis by  
365 Suppressing the SIRT1-FOXO1 Cascade. *EMBO Molecular Medicine* 5, 10: 1602–1612.

366 doi:10.1002/emmm.201302647

367 Bai, Y., Huang, J.-M., Liu, G., Zhang, J.B., Wang, J.Y., Liu C.-K., Fang, M.-Y., 2014. A

368 Comprehensive microRNA Expression Profile of the Backfat Tissue from Castrated and Intact

369 Full-Sib Pair Male Pigs. *BMC Genomics* 15, 47. doi:10.1186/1471-2164-15-47

370 Bortoluzzi, S., Biasiolo M., Bisognin A., 2011. microRNA-Offset RNAs (moRNAs): By-Product

371 Spectators or Functional Players?. *Trends in Molecular Medicine*. 17, 473-474.

372 doi:10.1016/j.molmed.2011.05.005

373 Bortoluzzi, S., Bisognin, A., Biasiolo, M., Guglielmelli, P., Biamonte, F., Norfo, R., Manfredini, R.,

374 Vannucchi, A.M., 2012. Characterization and discovery of novel miRNAs and moRNAs in

375 JAK2V617F-mutated SET2 cells. *Blood* 119, e120–e130. doi:10.1182/blood-2011-07-368001

376 Chen, C., Deng, B., Qiao, M., Zheng, R., Chai, J., Ding, Y., Peng, J., Jiang, S., 2012. Solexa

377 Sequencing Identification of Conserved and Novel microRNAs in Backfat of Large White and

378 Chinese Meishan Pigs. *PLoS One* 7, e31426. doi:10.1371/journal.pone.0031426

- 379 Chen, L., Dai, Y.-M., Ji, C.-B., Yang, L., Shi, C.-M., Xu, G.-F., Pang, L.-X., Huang, F.-Y., Zhang, C.-M.,  
380 Guo, X.-R., 2014. MiR-146b Is a Regulator of Human Visceral Preadipocyte Proliferation and  
381 Differentiation and Its Expression Is Altered in Human Obesity. *Molecular and Cellular*  
382 *Endocrinology* 393, 65–74. doi:10.1016/j.mce.2014.05.022
- 383 Cordell, H.J., 2002. Epistasis: what it means, what it doesn't mean, and statistical methods to  
384 detect it in humans. *Human Molecular Genetics* 11,2463-2468.
- 385 Enright, A.J., John, B., Gaul, U., Tuschl, T., Sander, C., Marks, D.S., 2003. MicroRNA targets in  
386 *Drosophila*. *Genome Biology* 5, R1. doi:10.1186/gb-2003-5-1-r1
- 387 Friedländer, M.R., Mackowiak, S.D., Li, N., Chen, W., Rajewsky, N., 2011. miRDeep2 accurately  
388 identifies known and hundreds of novel microRNA genes in seven animal clades. *Nucl Acids*  
389 *Res* 40, 37-52. doi:10.1093/nar/gkr688
- 390 Gaffo, E., Zambonelli, P., Bisognin, A., Bortoluzzi, S., Davoli, R., 2014. miRNome of Italian Large  
391 White pig subcutaneous fat tissue: new miRNAs, isomiRs and moRNAs. *Anim Genet* 45, 685–  
392 698. doi:10.1111/age.12192
- 393 Guglielmelli, P., Bisognin, A., Saccoman, C., Mannarelli, C., Coppe, A., Vannucchi, A.M.,  
394 Bortoluzzi S., 2015. Small RNA Sequencing Uncovers New miRNAs and moRNAs Differentially  
395 Expressed in Normal and Primary Myelofibrosis CD34+ Cells. *PLoS ONE* 10, e0140445.  
396 doi:10.1371/journal.pone.0140445
- 397 Guo, Y., Mo, D., Zhang, Y., Zhang, Y., Cong, P., Xiao, S., He, Z., Liu, X., Chen. Y. 2012.  
398 MicroRNAome Comparison between Intramuscular and Subcutaneous Vascular Stem Cell  
399 Adipogenesis. *PloS One* 7, e45410. doi:10.1371/journal.pone.0045410

- 400 Heneghan, H.M., Miller, N., McAnena, O.J., O'Brien, T., Kerin, M.J., 2011. Differential MiRNA  
401 Expression in Omental Adipose Tissue and in the Circulation of Obese Patients Identifies  
402 Novel Metabolic Biomarkers. *The Journal of Clinical Endocrinology & Metabolism* 96, E846–  
403 50. doi:10.1210/jc.2010-2701
- 404 Hu, F., Xu, P., Sun, B., Xiao, Z. 2017. Differences in the MicroRNA Profiles of Subcutaneous  
405 Adipose-Derived Stem Cells and Omental Adipose-Derived Stem Cells. *Gene* 625, 55–63.  
406 doi:10.1016/j.gene.2017.05.014
- 407 Hulsmans, M., Van Dooren, E., Mathieu, C., Holvoet, P., 2012. Decrease of miR-146b-5p in  
408 Monocytes during Obesity Is Associated with Loss of the Anti-Inflammatory but Not Insulin  
409 Signaling Action of Adiponectin. *PLoS ONE* 7, e32794. doi:10.1371/journal.pone.0032794
- 410 Kozomara, A., Griffiths-Jones, S., 2013. miRBase: annotating high confidence microRNAs using  
411 deep sequencing data. *Nucleic Acids Research* 42, D68–D73. doi:10.1093/nar/gkt1181
- 412 Kuleshov, M.V., Jones, M.R., Rouillard, A.D., Fernandez, N.F., Duan, Q., Wang, Z., Koplev, S.,  
413 Jenkins, S.L., Jagodnik, K.M., Lachmann, A., McDermott, M.G., Monteiro, C.D., Gundersen,  
414 G.W., Ma'ayan, A. 2016. Enrichr: a comprehensive gene set enrichment analysis web server  
415 2016 update. *Nucleic Acids Research*, 44, Web Server issue, W90–97.  
416 doi:10.1093/nar/gkw377
- 417 Li, G., Li, Y., Li, X., Ning, X., Li, M., Yang, G., 2011. MicroRNA Identity and Abundance in  
418 Developing Swine Adipose Tissue as Determined by Solexa Sequencing. *Journal of Cellular*  
419 *Biochemistry* 112, 1318–1328. doi:10.1002/jcb.23045
- 420 Li, H.-Y., Xi, Q.-Y., Xiong, Y.-Y., Liu, X.-L., Cheng, X., Shu, G., Wang, S.-B., Wang, L.N., Gao, P., Zhu,  
421 X.T., Jiang, Q.Y., Yuan, L., Zhang, Y.L., 2012. Identification and Comparison of microRNAs

422 from Skeletal Muscle and Adipose Tissues from Two Porcine Breeds. *Animal Genetics* 43, 6:  
423 704–713. doi:10.1111/j.1365-2052.2012.02332.x

424 Londin, E., Loher, P., Telonis, A.G., Quann, K., Clark, P., Jing, Y., Hatzimichael, E., Kirino, Y.,  
425 Honda, S., Lally, M., Ramratnam, B., Comstock, C.E.S., Knudsen, K.E., Gomella, L., Spaeth,  
426 G.L., Hark, L., Katz, L.J., Witkiewicz, A., Rostami, A., Jimenez, S.A., Hollingsworth, M.A., Yeh,  
427 J.J., Shaw, C.A., McKenzie, S.E., Bray, P., Nelson, P.T., Zupo, S., Roosbroeck, K.V., Keating,  
428 M.J., Calin, G.A., Yeo, C., Jimbo, M., Cozzitorto, J., Brody, J.R., Delgrosso, K., Mattick, J.S.,  
429 Fortina, P., Rigoutsos, I., 2015. Analysis of 13 cell types reveals evidence for the expression of  
430 numerous novel primate- and tissue-specific microRNAs. *PNAS* 112, E1106-E1115.  
431 doi:10.1073/pnas.1420955112

432 Love, M.I., Huber, W., Anders, S., 2014. Moderated estimation of fold change and dispersion for  
433 RNA-Seq data with DESeq2. *Genome Biology* 15, 550. doi: 10.1186/s13059-014-0550-8.

434 Meale, S.J., Romao, J.M., He, M.L., Chaves, A.V., McAllister, T.A., Guan, L.L., 2014. Effect of Diet  
435 on microRNA Expression in Ovine Subcutaneous and Visceral Adipose Tissues. *Journal of*  
436 *Animal Science* 92, 3328–37. doi:10.2527/jas.2014-7710

437 Meerson, A., Traurig, M., Ossowski, V., Fleming, J.M., Mullins, M., Baier, L.J., 2013. Human  
438 Adipose MicroRNA-221 Is Upregulated in Obesity and Affects Fat Metabolism Downstream  
439 of Leptin and TNF- $\alpha$ . *Diabetologia* 56, 1971–79. doi:10.1007/s00125-013-2950-9

440 Nakanishi, N., Nakagawa, Y., Tokushige, N., Aoki, N., Matsuzaka, T., Ishii, K., Yahagi, N.,  
441 Kobayashi, K., Yatoh, S., Takahashi, A., Suzuki, H., Urayama, O., Yamada, N., Shimano, H.,  
442 2009. The Up-Regulation of MicroRNA-335 Is Associated with Lipid Metabolism in Liver and

- 443 White Adipose Tissue of Genetically Obese Mice. *Biochemical and Biophysical Research*  
444 *Communications* 385, 492–96. doi:10.1016/j.bbrc.2009.05.058
- 445 Oger, F., Gheeraert, C., Mogilenko, D., Benomar, Y., Molendi-Coste, O., Bouchaert, E., Caron, S.  
446 Dombrowicz, D., Pattou, F., Duez, H., Eeckhoutte, J., Staels, B., Lefebvre, P., 2014. Cell-Specific  
447 Dysregulation of MicroRNA Expression in Obese White Adipose Tissue. *The Journal of Clinical*  
448 *Endocrinology & Metabolism* 99, 2821–2833. <https://doi.org/10.1210/jc.2013-4259>
- 449 Parra, P., Serra, F., Palou, A., 2010. Expression of Adipose MicroRNAs Is Sensitive to Dietary  
450 Conjugated Linoleic Acid Treatment in Mice. *PloS One* 5, e13005.  
451 doi:10.1371/journal.pone.0013005
- 452 Rai, S.N., Ray, H.E., Yuan, X., Pan, J., Hamid, T., Prabhu, S.D., 2012. Statistical analysis of  
453 repeated microrna high-throughput data with application to human heart failure: A review  
454 of methodology. *Open access medical statistics* 2012, 21–31. DOI: 10.2147/OAMS.S27907
- 455 Rivals, I., Personnaz, L., Taing, L., and Potier, M.-C., 2007. Enrichment or depletion of a GO  
456 category within a class of genes: which test? *Bioinformatics* 23, 401–407. DOI:  
457 10.1093/bioinformatics/btl633
- 458 Sangiao-Alvarellos, S., Pena-Bello, L., Manfredi-Lozano, M., Tena-Sempere, M., Cordido, F.,  
459 2014. Perturbation of Hypothalamic MicroRNA Expression Patterns in Male Rats After  
460 Metabolic Distress: Impact of Obesity and Conditions of Negative Energy Balance.  
461 *Endocrinology* 155, 1838–1850. <https://doi.org/10.1210/en.2013-1770>.
- 462 Shi, C., Zhu, L., Chen, X., Gu, N., Chen, L., Zhu, L., Yang, L., Pang, L., Guo, X., Ji, C., Zhang, C.,  
463 2014. IL-6 and TNF- $\alpha$  Induced Obesity-Related Inflammatory Response Through

464        Transcriptional Regulation of MiR-146b. *Journal of Interferon & Cytokine Research* 34, 342–  
465        348. doi:10.1089/jir.2013.0078

466        Shi, X.-E., Li, Y.-F., Jia, L., Ji, H.-L., Song, Z.-Y., Cheng, J., Wu, G.-F., Song, C.C., Zhang, Q.L., Zhu,  
467        J.Y., Yang, G.S. 2014. MicroRNA-199a-5p Affects Porcine Preadipocyte Proliferation and  
468        Differentiation. *International Journal of Molecular Sciences* 15, 8526–8538.  
469        doi:10.3390/ijms15058526

470        Yu, X., Zhang, X., Dhakal, I.B., Beggs, M., Kadlubar, S., Luo, D., 2012. Induction of cell  
471        proliferation and survival genes by estradiol repressed microRNAs in breast cancer cells.  
472        *BMC Cancer* 12, 29. doi: 10.1186/1471-2407-12-29

473        Zambonelli, P., Gaffo, E., Zappaterra, M., Bortoluzzi S., Davoli, R., 2016. Transcriptional profiling  
474        of subcutaneous adipose tissue in Italian Large White pigs divergent for backfat thickness.  
475        *Animal Genetics* 47, 306-323. doi: 10.1111/age.12413

476        Zhu, L., Chen, L., Shi, C.-M., Xu, G.-F., Xu, L.-L., Zhu, L.-L., Guo, X.-R., Ni, Y., Cui, Y., Ji, C., 2014.  
477        MiR-335, an Adipogenesis-Related MicroRNA, Is Involved in Adipose Tissue Inflammation.  
478        *Cell Biochemistry and Biophysics* 68, 283–290. <https://doi.org/10.1007/s12013-013-9708-3>  
479  
480

481 **Supporting information**

482 Additional supporting information may be found in the online version of this article.

483 **Supplementary Tables are included in the file: DEM-DET-**

484 **Target\_SupplementaryTables\_rev.xlsx**

485

486 **Table S1 (ST1).** Samples RIN numbers.

487

488 **Table S2 (ST2).** Sample raw reads filtering.

489

490 **Table S3 (ST3).** Small RNAs expressed.

491

492 **Table S4 (ST4).** List of all DE tests obtained.

493

494 **Table S5 (ST5).** IsomiRs specific for FAT or LEAN samples.

495

496 **Table S6 (ST6).** Differentially expressed small RNA targets among differentially expressed  
497 transcripts.

498

499 **Table S7(ST7).** QTL enrichment for differentially expressed sRNAs and target genes.

500

501



502 **Figure S1.** Outline of the computational analysis workflow. Long and short RNA-seq data in the  
503 same backfat samples of 10 LEAN and 10 FAT animals have been considered; after detection,  
504 discovery and quantification of miRNA and miRNA-like small RNAs, integrative analyses of  
505 target prediction and of miRNA and transcript expression profiles were used for miRNA-  
506 transcript regulatory network inference.

507 **File: FigureSF1\_rev.pdf**

508

509 **Figure S2.** Cumulative expression of gene expression measures show a similar pattern in the  
510 FAT and LEAN groups. The small panel inside the figure corresponds to the region shaded in  
511 light blue in the main panel.

512 **File: FigureSF2\_rev.pdf**

513

514 **Figure S3.** IsomiR composition of known and newly predicted miRNAs resulting differentially  
515 expressed in backfat tissue of LEAN and FAT animals. Colors and labels are relative to each  
516 single bar-chart. The same color may refer to different labels. Portion of the bars not reaching  
517 100% represents isoforms composing each less than 10% of the overall miR expression.

518 **File: FigureSF3\_rev.pdf**

519

520

## 521 **Figure captions**

522 **Figure 1.** Heatmap of expression profiles of miRNAs differentially expressed (DEMs) comparing  
523 FAT vs LEAN animals.

524 Rows of the heatmap represent the 31 DEMs, columns correspond to samples. The heatmap  
525 cells are colored according to the deviance of the sRNA expression in the sample from the  
526 average expression of the sRNA, thus red and blue cells represent respectively expression  
527 values higher or lower than mean expression across all samples (white) with color intensity  
528 proportional to the difference from the mean, in the regularized logarithmic scale.

529 **File: Figure1\_rev.pdf**

530

531 **Figure 2.** Validation by qRT-PCR of eight DE miRNAs and of the DE moRNA detected by RNA-seq.

532 A) Correlation between fold changes calculated according to RNA-seq (horizontal axis) and qRT-  
533 PCR (vertical axis) estimations. Dashed line indicates linear smoothing of the points.  $R_s$  =  
534 Spearman's rank correlation coefficient. B) Significance of differential expression tests  
535 according to qRT-PCR data. T-test p-value: ns = not significant; \* = <0.05, \*\* <0.01; \*\*\* =  
536 <0.001.  $\Delta Cq$  = difference between U6 and the target miRNA PCR-derived cycle thresholds.

537 **File: Figure2\_rev.pdf**

538

539 **Figure 3.** Differentially expressed miRNAs and their putative predicted target transcripts  
540 differentially expressed. The network depicts the predicted interactions between: A) miRNAs  
541 downregulated in FAT animals and putative target transcripts upregulated in FAT animals; B)

542 miRNAs upregulated in FAT animals and putative target transcripts downregulated in FAT  
543 animals; miRNA-target relations with expression profiles correlation  $< -0.6$  are reported,  
544 involving 26 miRNA (blue circle nodes) and 28 transcripts (square nodes, coloured green if  
545 coding, lilac if non-coding, and orange if reliably non-coding) for a total of 92 interactions  
546 (edges). Edge thickness is inversely proportional to the correlation intensity (the smaller the  
547 correlation, the thicker the line). Nodes borders are coloured in red if representing a newly  
548 predicted transcript or miRNA precursor, orange for new sister miRNAs, and green for known  
549 miRNAs. C) KEGG and Reactome pathways significantly enriched in genes included in the  
550 network of panel A-B.

551 **File: Figure3\_rev.pdf**

552

553

554 **Tables**

555 **Table 1.** Short RNAs resulting differentially expressed in backfat of FAT vs LEAN animals

556 according to RNA-seq data.

| Name              | Type       | Mature sequence          | Average expression (RPM)* | % of expressed sRNAs | Log <sub>2</sub> Fold Change | Adjusted p-value |
|-------------------|------------|--------------------------|---------------------------|----------------------|------------------------------|------------------|
| ssc-miR-146b      | known      | ugagaacugaaauccauaggc    | 20131.80                  | 2.13E-02             | 0.97                         | 0.01             |
| ssc-miR-365-5p    | known      | gagggacuucaggggcagcugu   | 799.48                    | 1.15E-03             | 0.89                         | 0.00             |
| chr9_40038-5p     | new        | cuccggcuggcugcca         | 21.81                     | 8.53E-03             | 0.83                         | 0.01             |
| ssc-miR-221-5p    | known      | accuggcauacaauaguauuucug | 2916.44                   | 1.20E-03             | 0.77                         | 0.01             |
| ssc-moR-21-5p     | moRNA      | ctccatggctgtaccacctgtcgg | 9.63                      | 3.01E-03             | 0.76                         | 0.01             |
| ssc-miR-222       | known      | agcuacaucuggcuacugggucuc | 2863.37                   | 2.35E-02             | 0.75                         | 0.01             |
| chr5_31322-3p     | new        | ucugagaugugaccugggcau    | 27.77                     | 6.09E-04             | 0.72                         | 0.01             |
| JH118494-1_44794- | new        | ucugagaugugaccugggcau    | 11.40                     | 6.09E-04             | 0.72                         | 0.01             |
| chr7_37486-3p     | new        | aaguccaucugggucgcc       | 24.49                     | 6.79E-04             | 0.69                         | 0.02             |
| chr3_26283-5p     | new        | uuggcucugcgaggucggcuca   | 30.91                     | 2.56E-03             | 0.69                         | 0.00             |
| ssc-miR-128-1-5p  | new sister | cggggccgtagcactgtctgag   | 138.40                    | 5.09E-04             | 0.53                         | 0.02             |
| ssc-miR-132       | known      | uaacagucuacagccauggucg   | 55877.75                  | 4.04E-03             | 0.50                         | 0.03             |
| ssc-miR-1306-5p   | known      | ccaccucccugcaaacgucca    | 70505.29                  | 2.34E-03             | 0.47                         | 0.02             |
| GL896302-1_48155- | new        | ucucugggcccugugucuaggcu  | 12.42                     | 2.09E-03             | 0.39                         | 0.02             |
| ssc-let-7c        | known      | ugagguaguagguuuguaugguu  | 2435309.00                | 5.98E-01             | -0.32                        | 0.01             |
| ssc-miR-130a      | known      | cagugcaauguuaaaagggcau   | 56716.38                  | 4.26E-02             | -0.38                        | 0.02             |
| ssc-miR-181c      | known      | aacauucaaccugucggugagu   | 9716.73                   | 1.15E-01             | -0.39                        | 0.01             |
| ssc-miR-214-5p    | new sister | tgctgtctacactgtctgtgc    | 93.15                     | 8.13E-03             | -0.42                        | 0.00             |
| ssc-miR-199a-5p   | known      | cccaguguucagacuaccuguuc  | 5221.81                   | 1.71E-01             | -0.44                        | 0.00             |
| ssc-miR-199a-3p   | known      | acaguagucugcacauugguua   | 5352.48                   | 1.34E+00             | -0.45                        | 0.01             |
| ssc-miR-199b-3p   | known      | uacaguagucugcacauugguu   | 5118.61                   | 6.70E-01             | -0.45                        | 0.01             |
| ssc-miR-99a-3p    | new sister | caagctcgtcttatgggtctg    | 56.14                     | 1.81E-02             | -0.47                        | 0.00             |
| ssc-miR-195       | known      | uagcagcacagaaauuuggc     | 6255.99                   | 1.60E-01             | -0.50                        | 0.02             |
| ssc-miR-101-2-5p  | new sister | tcagttatcacagtgtgatgct   | 152.31                    | 1.45E-03             | -0.61                        | 0.02             |
| ssc-miR-193a-3p   | known      | aacuggccuacaaaguccagu    | 6485.75                   | 2.93E-02             | -0.62                        | 0.02             |
| ssc-miR-136-3p    | new sister | catcatcgtctcaaatgagtct   | 133.91                    | 8.57E-03             | -0.63                        | 0.02             |
| ssc-miR-335       | known      | ucaagagcauaaacgaaaaaug   | 1118.26                   | 8.38E-04             | -0.75                        | 0.02             |
| ssc-miR-133a-3p   | known      | uuggucccucaaccagcug      | 52301.03                  | 1.44E-02             | -0.79                        | 0.03             |
| ssc-miR-545-3p    | known      | aucaacaacauuuauugugug    | 381.19                    | 7.45E-04             | -0.81                        | 0.04             |
| ssc-miR-136       | known      | acuccauuuguuuugaugaugga  | 32337.35                  | 2.42E-03             | -0.94                        | 0.01             |
| ssc-miR-362-3p    | new sister | aacacacctattcaaggattc    | 76.01                     | 2.91E-04             | -0.97                        | 0.01             |

557 \* Read Per Million

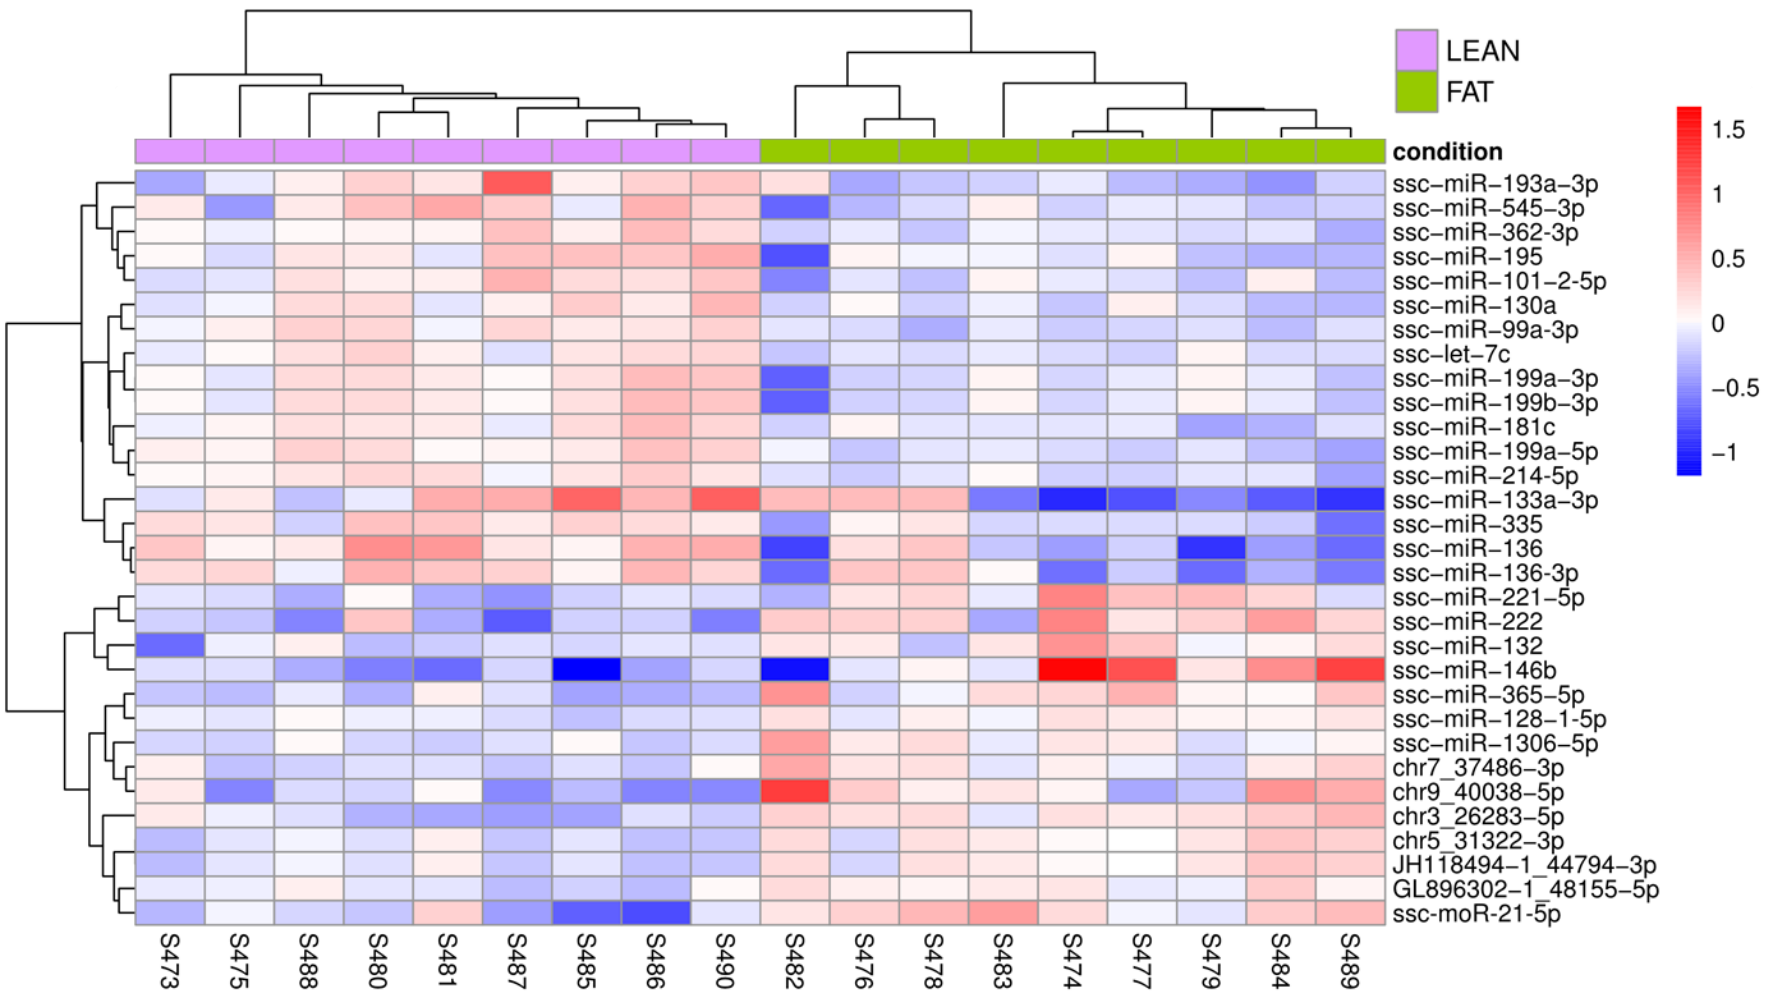

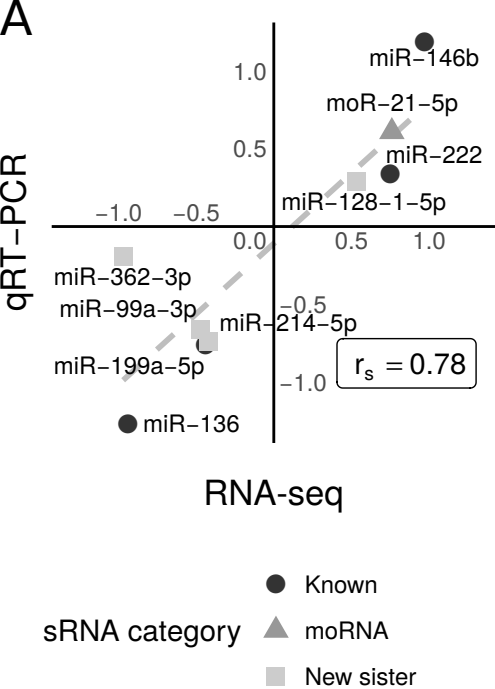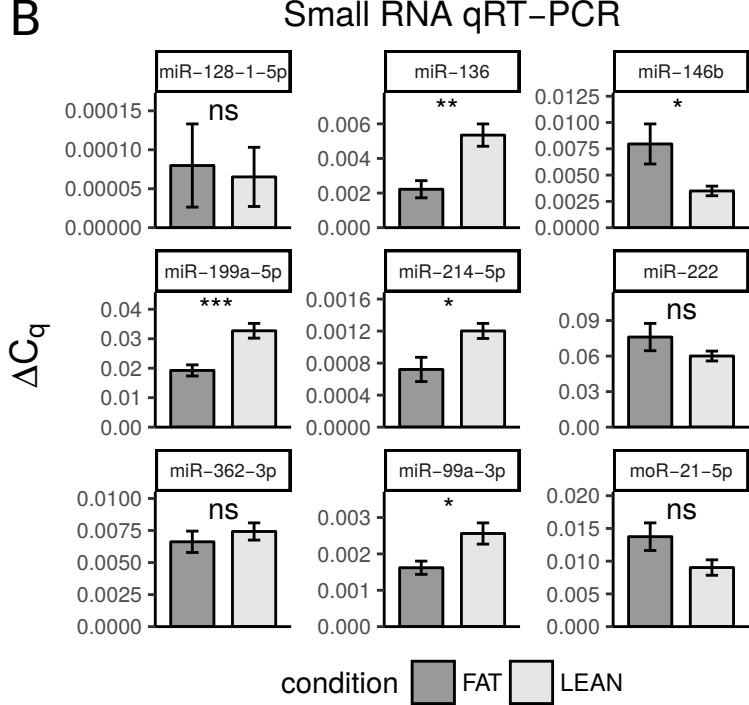

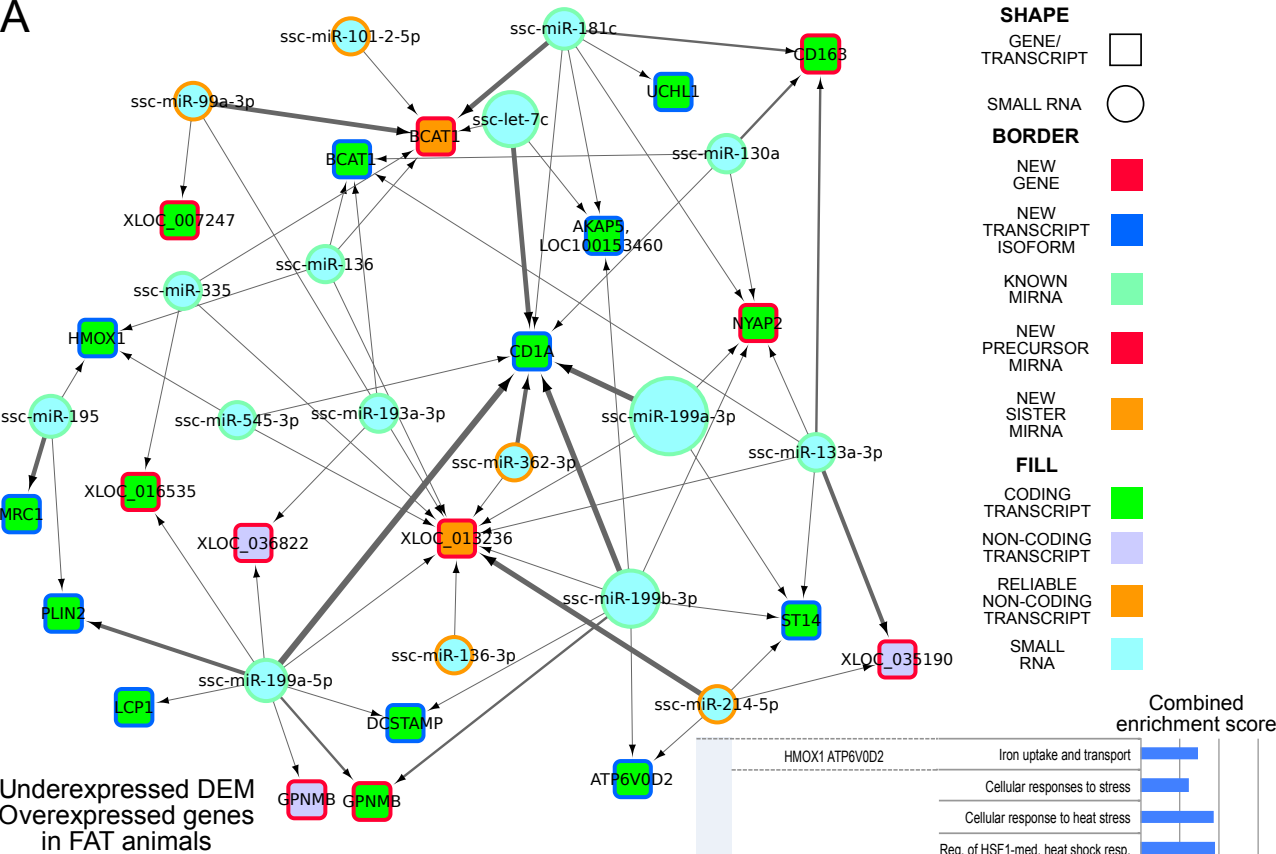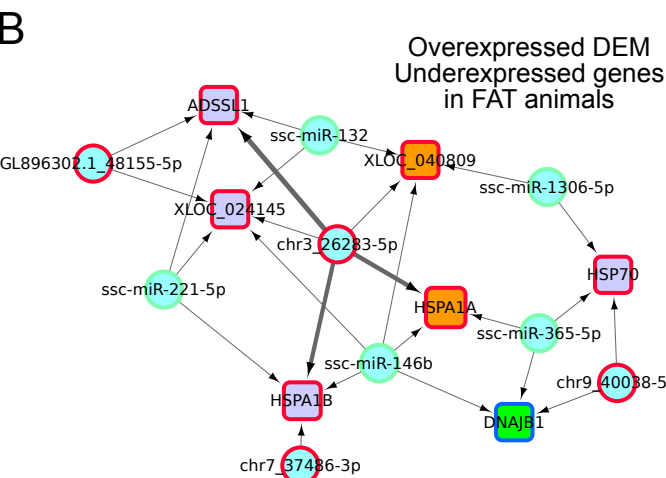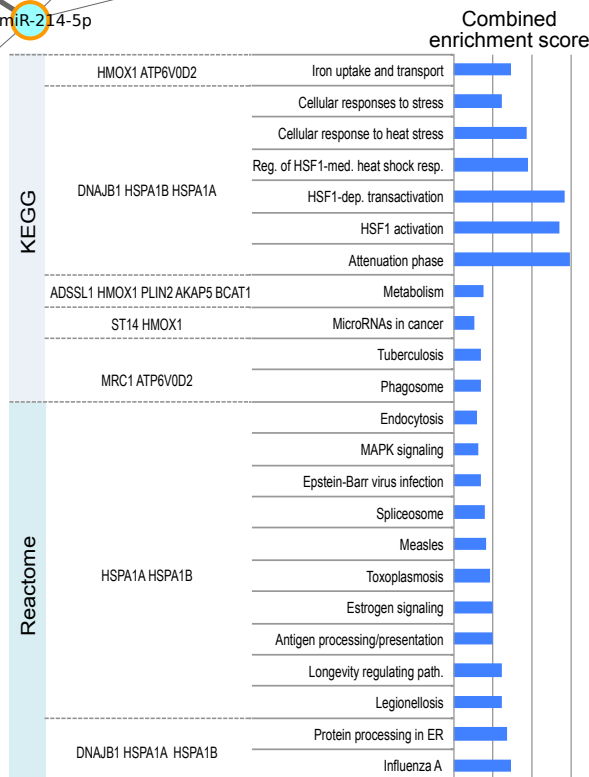

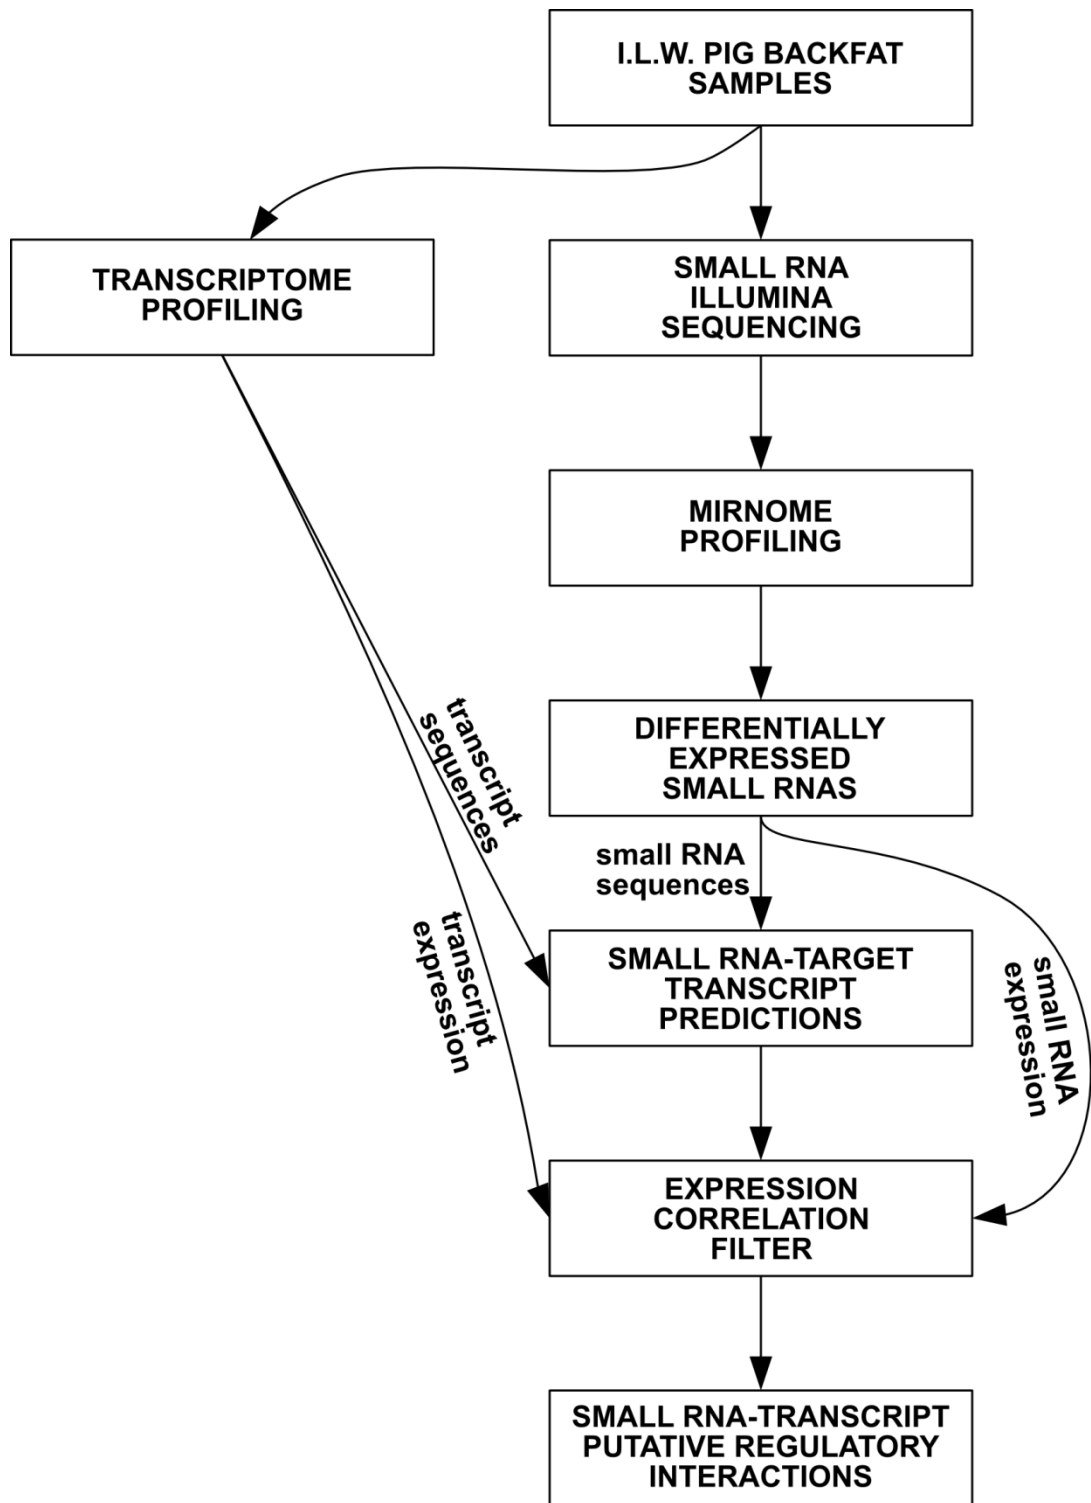



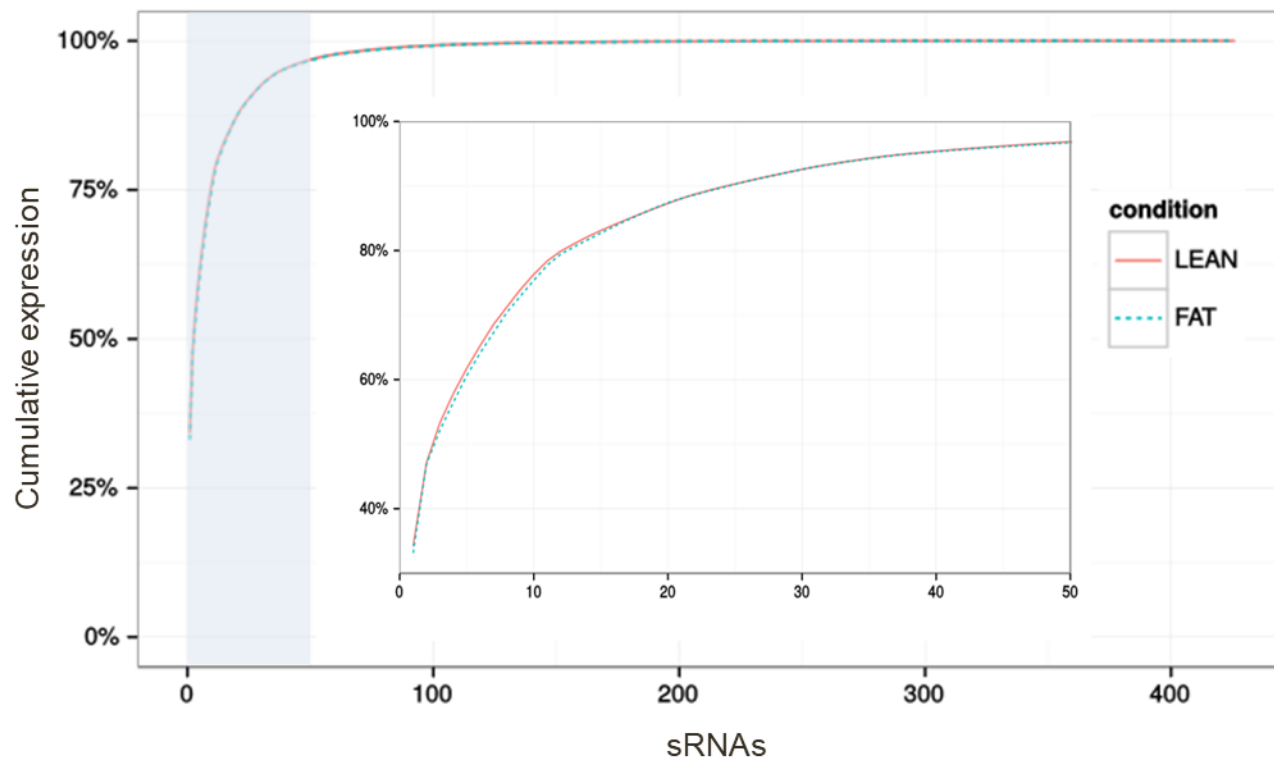

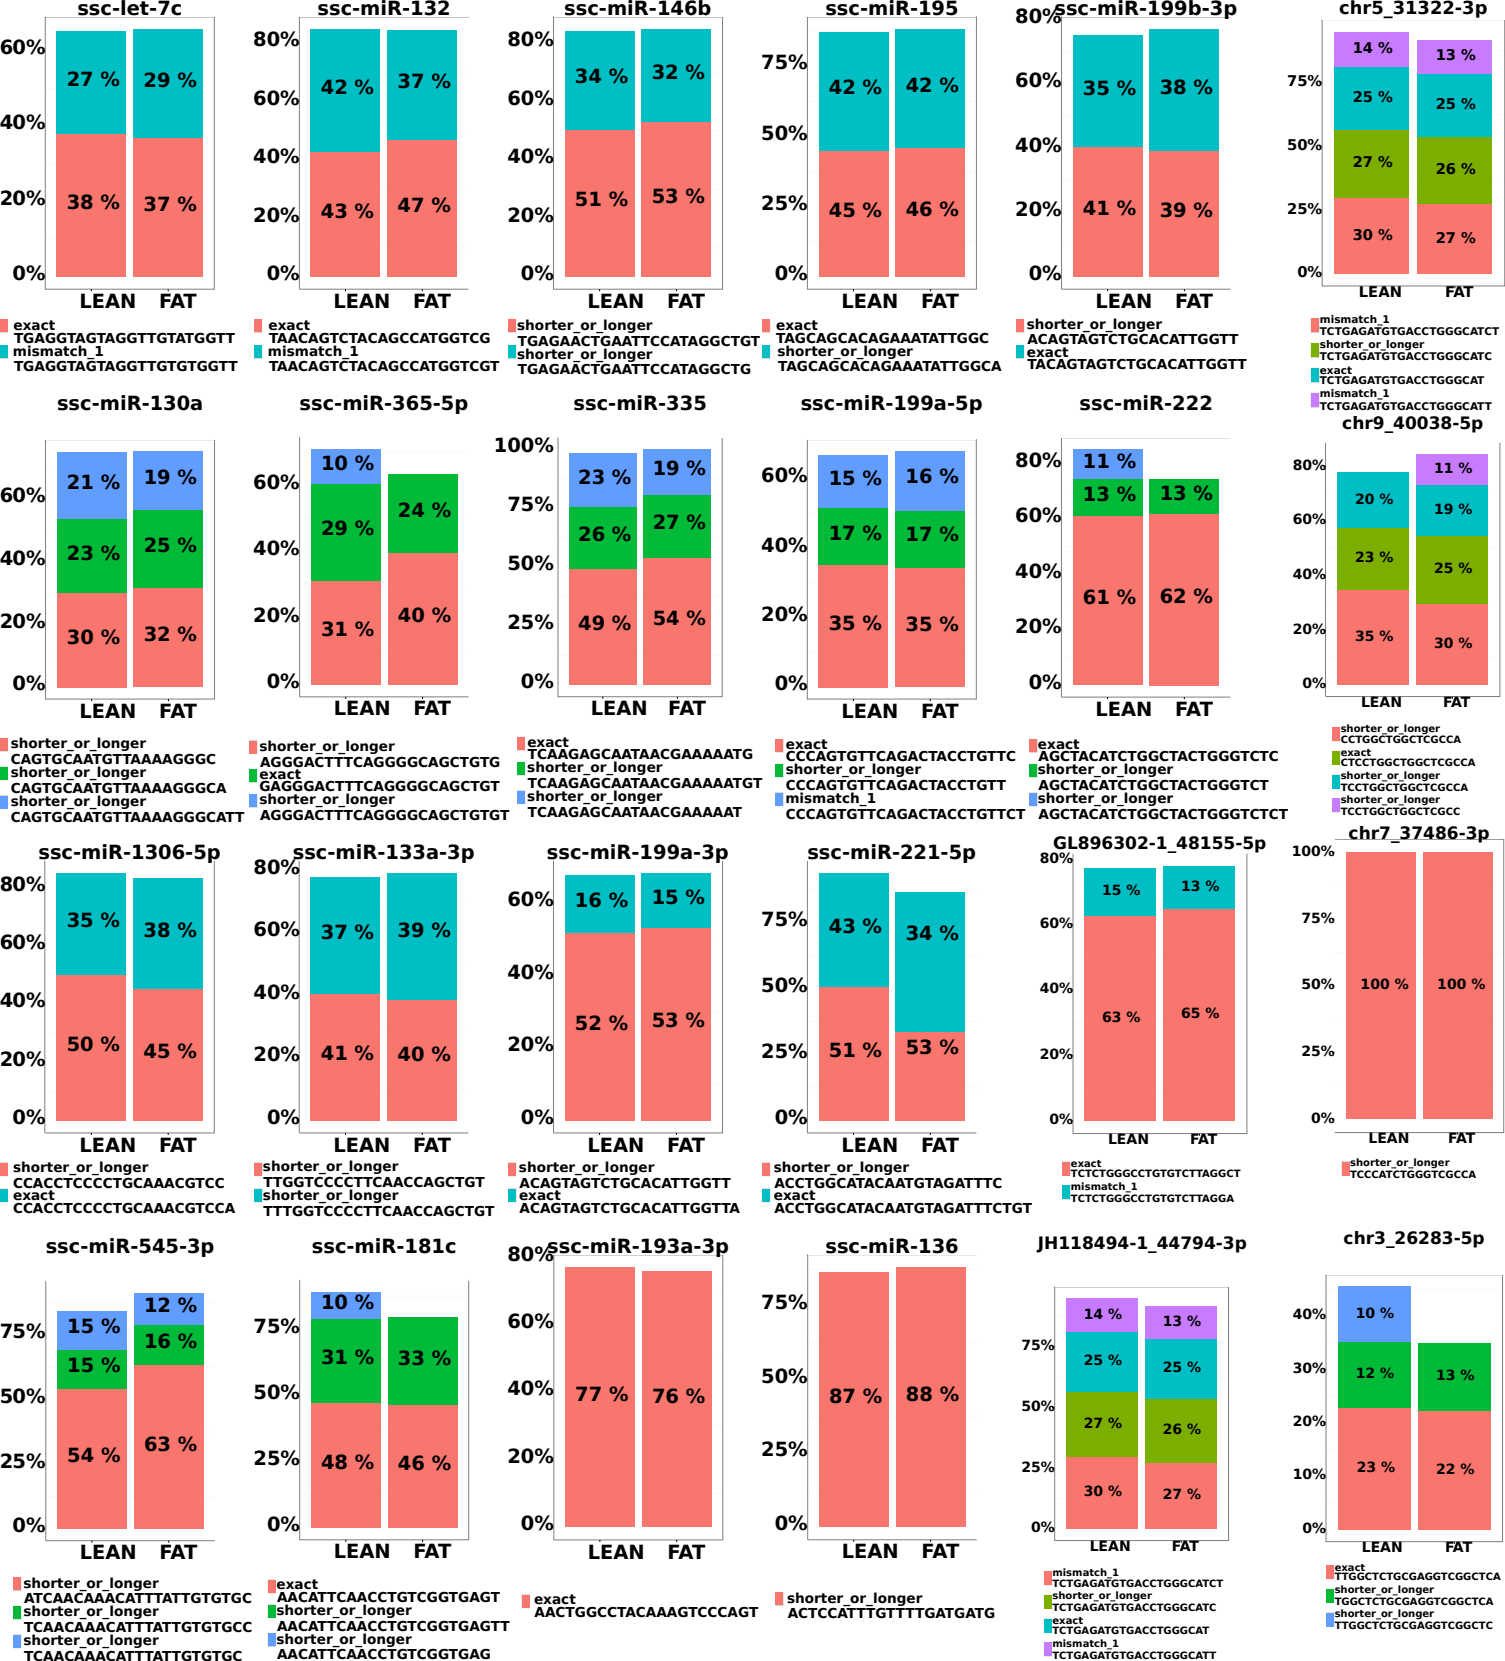

Source: http://biorxiv.org/content/10.1101/245670v1.full.pdf
